# Supplementary material
Source: publisher figshare collection journal article supplement (https://sage.figshare.com/ndownloader/files/36009509)
Supplement: Supplementary file 1 [file 36009509]

| **Sex: Male** | | **Total Instances Observed** | | | **Incidence Range** | | |
| --- | --- | --- | --- | --- | --- | --- | --- |
| **Tissue** | **Observation** | **Cambodian** | **Chinese** | **Vietnamese** | **Cambodian** | **Chinese** | **Vietnamese** |
| Esophagus | Degeneration/Necrosis | 2 (0.87%), N=229 | 2 (0.33%), N=602 | - | [0-20.00%] | [0-20.00%] | - |
| Edema | - | 1 (0.17%), N=602 | - | - | [0-16.67%] | - |
| Erosion/Ulcer | - | 1 (0.17%), N=602 | - | - | [0-16.67%] | - |
| Infiltrate, (Mononuclear Cell) | 3 (1.31%), N=229 | 14 (2.33%), N=602 | 4 (4.08%), N=98 | [0-20.00%] | [0-50.00%] | [0-50.00%] |
| Inflammation | 1 (0.44%), N=229 | 1 (0.17%), N=602 | 1 (1.02%), N=98 | [0-20.00%] | [0-25.00%] | [0-20.00%] |
| Regeneration | - | - | 1 (1.02%), N=98 | - | - | [0-20.00%] |
| Gallbladder | Adhesion/Inflammation/Fibrosis | - | 1 (0.17%), N=593 | - | - | [0-25.00%] | - |
| Cyst | - | - | 1 (1.02%), N=98 | - | - | [0-11.11%] |
| Infiltrate, (Eosinophils) | 1 (0.47%), N=215 | - | - | [0-12.50%] | - | - |
| Infiltrate, (Mononuclear Cell) | 3 (1.4%), N=215 | 8 (1.35%), N=593 | - | [0-50.00%] | [0-50.00%] | - |
| Inflammation | 3 (1.4%), N=215 | 3 (0.51%), N=593 | - | [0-60.00%] | [0-40.00%] | - |
| Galt | Granuloma | - | 1 (0.17%), N=600 | - | - | [0-25.00%] | - |
| Infiltrate, (Eosinophils) | - | 1 (0.17%), N=600 | - | - | [0-20.00%] | - |
| Infiltrate, (Mononuclear Cell) | - | 1 (0.17%), N=600 | - | - | [0-14.29%] | - |
| Inflammation | - | 1 (0.17%), N=600 | 1 (1.08%), N=93 | - | [0-33.33%] | [0-16.67%] |
| Pigment | - | 1 (0.17%), N=600 | - | - | [0-25.00%] | - |
| Large Intestine, Cecum | Dilatation | - | 1 (0.16%), N=612 | 2 (1.98%), N=101 | - | [0-20.00%] | [0-16.67%] |
| Granuloma | - | - | 1 (0.99%), N=101 | - | - | [0-20.00%] |
| Hemorrhage | - | 2 (0.33%), N=612 | 1 (0.99%), N=101 | - | [0-33.33%] | [0-20.00%] |
| Infiltrate, (Eosinophils) | 1 (0.44%), N=229 | 1 (0.16%), N=612 | - | [0-20.00%] | [0-16.67%] | - |
| Infiltrate, (Mononuclear Cell) | 3 (1.31%), N=229 | 8 (1.31%), N=612 | 2 (1.98%), N=101 | [0-40.00%] | [0-66.67%] | [0-22.22%] |
| Inflammation (Peritoneal) | - | - | 1 (0.99%), N=101 | - | - | [0-20.00%] |
| Inflammation | 3 (1.31%), N=229 | 6 (0.98%), N=612 | - | [0-33.33%] | [0-33.33%] | - |
| Mineralization | - | 3 (0.49%), N=612 | - | - | [0-40.00%] | - |
| Parasite | 4 (1.75%), N=229 | 6 (0.98%), N=612 | - | [0-40.00%] | [0-33.33%] | - |
| Pigment | - | 1 (0.16%), N=612 | - | - | [0-16.67%] | - |
| Large Intestine, Colon | Anomaly (Developmental) | - | 2 (0.33%), N=613 | - | - | [0-25.00%] | - |
| Dilatation/Inflammation | - | 2 (0.33%), N=613 | 1 (1%), N=100 | - | [0-20.00%] | [0-11.11%] |
| Granuloma | - | 1 (0.16%), N=613 | - | - | [0-20.00%] | - |
| Infiltrate, (Eosinophils) | - | 1 (0.16%), N=613 | - | - | [0-16.67%] | - |
| Infiltrate, (Mononuclear Cell) | 2 (0.87%), N=229 | 7 (1.14%), N=613 | 1 (1%), N=100 | [0-20.00%] | [0-66.67%] | [0-11.11%] |
| Inflammation | 1 (0.44%), N=229 | - | - | [0-16.67%] | - | - |
| Macrophages | - | - | 1 (1%), N=100 | - | - | [0-16.67%] |
| Parasite | - | 4 (0.65%), N=613 | - | - | [0-40.00%] | - |
| Pigment | - | 3 (0.49%), N=613 | - | - | [0-33.33%] | - |
| Large Intestine, Rectum | Crust | - | 1 (0.18%), N=565 | - | - | [0-33.33%] | - |
| Erosion/Ulcer | 1 (0.45%), N=223 | 1 (0.18%), N=565 | - | [0-33.33%] | [0-14.29%] | - |
| Hemorrhage | 1 (0.45%), N=223 | 2 (0.35%), N=565 | - | [0-20.00%] | [0-16.67%] | - |
| Infiltrate, (Mononuclear Cell) | 1 (0.45%), N=223 | 4 (0.71%), N=565 | 1 (1.02%), N=98 | [0-20.00%] | [0-33.33%] | [0-11.11%] |
| Inflammation | - | 3 (0.53%), N=565 | - | - | [0-25.00%] | - |
| Liver | Degeneration/Necrosis | 1 (0.39%), N=257 | 5 (0.73%), N=688 | - | [0-33.33%] | [0-33.33%] | - |
| Extramedullary Hematopoiesis | - | 2 (0.29%), N=688 | 1 (0.88%), N=114 | - | [0-16.67%] | [0-20.00%] |
| Fibrosis | 1 (0.39%), N=257 | 16 (2.33%), N=688 | 1 (0.88%), N=114 | [0-16.67%] | [0-75.00%] | [0-20.00%] |
| Granuloma | - | 2 (0.29%), N=688 | - | - | [0-16.67%] | - |
| Hypertrophy | - | 2 (0.29%), N=688 | 1 (0.88%), N=114 | - | [0-25.00%] | [0-20.00%] |
| Infiltrate (Mixed Leukocyte) | 1 (0.39%), N=257 | 1 (0.15%), N=688 | - | [0-20.00%] | [0-20.00%] | - |
| Infiltrate, (Mononuclear Cell) | 67a*, b* (26.07%), N=257 | 236a* (34.3%), N=688 | 34b* (29.82%), N=114 | [0-100.00%] | [0-100.00%] | [0-80.00%] |
| Inflammation (Vascular) | - | 1 (0.15%), N=688 | - | - | [0-25.00%] | - |
| Inflammation | 4 (1.56%), N=257 | 14 (2.03%), N=688 | 5 (4.39%), N=114 | [0-20.00%] | [0-60.00%] | [0-33.33%] |
| Leukocytosis, Vascular | 1 (0.39%), N=257 | - | - | [0-20.00%] | - | - |
| Mineralization | - | 2 (0.29%), N=688 | - | - | [0-16.67%] | - |
| Multinucleated Hepatocytes | - | 1 (0.15%), N=688 | - | - | [0-16.67%] | - |
| Parasite | - | 1 (0.15%), N=688 | - | - | [0-20.00%] | - |
| Pigment | 1 (0.39%), N=257 | 7 (1.02%), N=688 | - | [0-20.00%] | [0-66.67%] | - |
| Vacuolation, (Hepatocellular) | 3 (1.17%), N=257 | 4 (0.58%), N=688 | - | [0-20.00%] | [0-20.00%] | - |
| Pancreas | Angiectasis | - | 1 (0.16%), N=623 | - | - | [0-16.67%] | - |
| Anomaly (Developmental) | 3 (1.27%), N=237 | 2 (0.32%), N=623 | - | [0-25.00%] | [0-25.00%] | - |
| Apoptosis | 2 (0.84%), N=237 | 1 (0.16%), N=623 | - | [0-16.67%] | [0-25.00%] | - |
| Atrophy | - | 1 (0.16%), N=623 | - | - | [0-20.00%] | - |
| Degeneration/Necrosis | - | 2 (0.32%), N=623 | - | - | [0-16.67%] | - |
| Hemorrhage | 1 (0.42%), N=237 | - | - | [0-20.00%] | - | - |
| Infiltrate, (Mononuclear Cell) | 6 (2.53%), N=237 | 14 (2.25%), N=623 | - | [0-22.22%] | [0-50.00%] | - |
| Pigment | - | 1 (0.16%), N=623 | - | - | [0-33.33%] | - |
| Secretory Depletion | 1 (0.42%), N=237 | 6 (0.96%), N=623 | - | [0-20.00%] | [0-75.00%] | - |
| Salivary Gland, Mandibular | Atrophy | - | 1 (0.17%), N=602 | - | - | [0-16.67%] | - |
| Cytoplasmic Alteration | - | 1 (0.17%), N=602 | - | - | [0-20.00%] | - |
| Infiltrate, (Mononuclear Cell) | 33 (14.35%), N=230 | 112 (18.6%), N=602 | 21 (21.43%), N=98 | [0-83.33%] | [0-100.00%] | [0-100.00%] |
| Inflammation | 3 (1.3%), N=230 | 1 (0.17%), N=602 | - | [0-60.00%] | [0-20.00%] | - |
| Mineralization | - | 6 (1%), N=602 | - | - | [0-25.00%] | - |
| Secretory Depletion | - | 4 (0.66%), N=602 | - | - | [0-50.00%] | - |
| Salivary Gland, Parotid | Infiltrate, (Mononuclear Cell) | 16a**, b** (30.77%), N=52 | 119a**, c** (30.43%), N=391 | 33b**, c** (33.67%), N=98 | [0-75.00%] | [0-100.00%] | [0-100.00%] |
| Mineralization | - | 5 (1.28%), N=391 | - | - | [0-25.00%] | - |
| Secretory Depletion | 1 (1.92%), N=52 | 1 (0.26%), N=391 | - | [0-12.50%] | [0-16.67%] | - |
| Salivary Gland, Sublingual | Infiltrate, (Mononuclear Cell) | 4a**, b** (26.67%), N=15 | 70a**, c** (33.02%), N=212 | 17b**, c** (19.1%), N=89 | [0-50.00%] | [0-100.00%] | [0-80.00%] |
| Small Intestine, Duodenum | Anomaly (Developmental) | - | 3 (0.49%), N=618 | - | - | [0-20.00%] | - |
| Degeneration/Necrosis | - | 1 (0.16%), N=618 | - | - | [0-14.29%] | - |
| Hemorrhage | - | 1 (0.16%), N=618 | - | - | [0-25.00%] | - |
| Infiltrate, (Mononuclear Cell) | 4 (1.76%), N=227 | 8 (1.29%), N=618 | - | [0-60.00%] | [0-60.00%] | - |
| Macrophages | 3 (1.32%), N=227 | 3 (0.49%), N=618 | - | [0-75.00%] | [0-20.00%] | - |
| Pigment | - | 2 (0.32%), N=618 | - | - | [0-20.00%] | - |
| Small Intestine, Ileum | Hypertrophy/Hyperplasia | 1 (0.44%), N=227 | - | 1 (1.02%), N=98 | [0-20.00%] | - | [0-11.11%] |
| Infiltrate, (Eosinophils) | - | - | 1 (1.02%), N=98 | - | - | [0-20.00%] |
| Inflammation (Vascular) | - | 1 (0.16%), N=613 | - | - | [0-20.00%] | - |
| Inflammation | 2 (0.88%), N=227 | 3 (0.49%), N=613 | - | [0-50.00%] | [0-33.33%] | - |
| Lymphangiectasis | - | 3 (0.49%), N=613 | - | - | [0-60.00%] | - |
| Small Intestine, Jejunum | Cyst | - | 1 (0.16%), N=611 | - | - | [0-33.33%] | - |
| Hypertrophy/Hyperplasia | 1 (0.44%), N=227 | - | - | [0-20.00%] | - | - |
| Infiltrate, (Mononuclear Cell) | 1 (0.44%), N=227 | - | - | [0-16.67%] | - | - |
| Inflammation | - | - | 1 (1.02%), N=98 | - | - | [0-20.00%] |
| Intussusception | 1 (0.44%), N=227 | - | - | [0-16.67%] | - | - |
| Lymphangiectasis | - | 2 (0.33%), N=611 | - | - | [0-40.00%] | - |
| Macrophages | 3 (1.32%), N=227 | 1 (0.16%), N=611 | - | [0-75.00%] | [0-20.00%] | - |
| Vacuolation (Epithelial Cell) | - | 1 (0.16%), N=611 | - | - | [0-11.11%] | - |
| Stomach | Adhesion/Inflammation/Fibrosis | - | 1 (0.15%), N=675 | - | - | [0-11.11%] | - |
| Congestion | - | 2 (0.3%), N=675 | 1 (0.9%), N=111 | - | [0-25.00%] | [0-20.00%] |
| Cyst | - | 2 (0.3%), N=675 | - | - | [0-40.00%] | - |
| Degeneration/Necrosis | 1 (0.42%), N=240 | 2 (0.3%), N=675 | - | [0-33.33%] | [0-25.00%] | - |
| Dilatation/Inflammation | 1 (0.42%), N=240 | - | - | [0-12.50%] | - | - |
| Edema | - | - | 1 (0.9%), N=111 | - | - | [0-20.00%] |
| Erosion/Ulcer | - | 4 (0.59%), N=675 | - | - | [0-33.33%] | - |
| Hemorrhage | 2 (0.83%), N=240 | 9 (1.33%), N=675 | 1 (0.9%), N=111 | [0-25.00%] | [0-33.33%] | [0-20.00%] |
| Infiltrate, (Mononuclear Cell) | 34 (14.17%), N=240 | 87 (12.89%), N=675 | 9 (8.11%), N=111 | [0-100.00%] | [0-100.00%] | [0-100.00%] |
| Inflammation | 1 (0.42%), N=240 | 5 (0.74%), N=675 | 2 (1.8%), N=111 | [0-20.00%] | [0-33.33%] | [0-16.67%] |
| Tongue | Bacteria | 1 (0.53%), N=187 | - | - | [0-20.00%] | - | - |
| Degeneration/Necrosis | - | 1 (0.18%), N=557 | - | - | [0-25.00%] | - |
| Erosion/Ulcer | 1 (0.53%), N=187 | - | - | [0-20.00%] | - | - |
| Fibrosis | - | 1 (0.18%), N=557 | - | - | [0-33.33%] | - |
| Fungus | 1 (0.53%), N=187 | - | - | [0-16.67%] | - | - |
| Hemorrhage | - | 1 (0.18%), N=557 | - | - | [0-11.11%] | - |
| Infiltrate, (Mononuclear Cell) | 2 (1.07%), N=187 | 22 (3.95%), N=557 | 2 (2%), N=100 | [0-33.33%] | [0-66.67%] | [0-22.22%] |
| Inflammation | 1 (0.53%), N=187 | 8 (1.44%), N=557 | - | [0-20.00%] | [0-33.33%] | - |
| Parasite | - | 1 (0.18%), N=557 | - | - | [0-16.67%] | - |
| Regeneration | - | 4 (0.72%), N=557 | 1 (1%), N=100 | - | [0-40.00%] | [0-20.00%] |

| **Sex: Female** | | **Total Instances Observed** | | | **Incidence Range** | | |
| --- | --- | --- | --- | --- | --- | --- | --- |
| **Tissue** | **Observation** | **Cambodian** | **Chinese** | **Vietnamese** | **Cambodian** | **Chinese** | **Vietnamese** |
| Esophagus | Cyst | - | 1 (0.17%), N=602 | - | - | [0-20.00%] | - |
| Degeneration/Necrosis | - | 1 (0.17%), N=602 | - | - | [0-16.67%] | - |
| Erosion/Ulcer | - | 1 (0.17%), N=602 | - | - | [0-11.11%] | - |
| Foreign Material | - | 1 (0.17%), N=602 | - | - | [0-11.11%] | - |
| Infiltrate, (Mononuclear Cell) | 6 (2.74%), N=219 | 14 (2.33%), N=602 | 1 (1.02%), N=98 | [0-40.00%] | [0-40.00%] | [0-16.67%] |
| Inflammation | - | 4 (0.66%), N=602 | - | - | [0-33.33%] | - |
| Regeneration | - | 4 (0.66%), N=602 | - | - | [0-20.00%] | - |
| Vacuolation | 1 (0.46%), N=219 | - | - | [0-20.00%] | - | - |
| Gallbladder | Infiltrate, (Eosinophils) | 1 (0.49%), N=206 | - | - | [0-16.67%] | - | - |
| Infiltrate, (Mononuclear Cell) | 2 (0.97%), N=206 | 4 (0.68%), N=590 | - | [0-33.33%] | [0-33.33%] | - |
| Inflammation | 1 (0.49%), N=206 | 5 (0.85%), N=590 | - | [0-16.67%] | [0-80.00%] | - |
| Galt | Cellularity Decreased, Lymphoid | - | 2 (0.34%), N=597 | - | - | [0-16.67%] | - |
| Inflammation | 1 (0.47%), N=211 | 2 (0.34%), N=597 | - | [0-16.67%] | [0-25.00%] | - |
| Large Intestine, Cecum | Abscess | 1 (0.45%), N=222 | - | - | [0-33.33%] | - | - |
| Adhesion/Inflammation/Fibrosis | - | 1 (0.16%), N=612 | - | - | [0-25.00%] | - |
| Dilatation | 2 (0.9%), N=222 | 3 (0.49%), N=612 | - | [0-20.00%] | [0-66.67%] | - |
| Infiltrate, (Eosinophils) | - | 1 (0.16%), N=612 | - | - | [0-16.67%] | - |
| Infiltrate, (Mononuclear Cell) | 6 (2.7%), N=222 | 10 (1.63%), N=612 | 2 (2.04%), N=98 | [0-33.33%] | [0-33.33%] | [0-22.22%] |
| Inflammation | 2 (0.9%), N=222 | 8 (1.31%), N=612 | - | [0-16.67%] | [0-33.33%] | - |
| Mineralization | 1 (0.45%), N=222 | - | - | [0-33.33%] | - | - |
| Parasite | 2 (0.9%), N=222 | 13 (2.12%), N=612 | - | [0-20.00%] | [0-83.33%] | - |
| Pigment | - | 1 (0.16%), N=612 | - | - | [0-20.00%] | - |
| Large Intestine, Colon | Hemorrhage | - | 5 (0.82%), N=609 | - | - | [0-33.33%] | - |
| Infiltrate, (Eosinophils) | - | 1 (0.16%), N=609 | - | - | [0-25.00%] | - |
| Infiltrate, (Mononuclear Cell) | 3 (1.36%), N=220 | 5 (0.82%), N=609 | 3 (3.06%), N=98 | [0-20.00%] | [0-33.33%] | [0-33.33%] |
| Inflammation | - | 4 (0.66%), N=609 | - | - | [0-33.33%] | - |
| Macrophages | - | 1 (0.16%), N=609 | - | - | [0-20.00%] | - |
| Parasite | - | 9 (1.48%), N=609 | - | - | [0-66.67%] | - |
| Pigment | - | 1 (0.16%), N=609 | - | - | [0-16.67%] | - |
| Large Intestine, Rectum | Abscess | 1 (0.47%), N=214 | - | - | [0-16.67%] | - | - |
| Congestion | - | 1 (0.18%), N=562 | - | - | [0-25.00%] | - |
| Cyst | 1 (0.47%), N=214 | - | - | [0-16.67%] | - | - |
| Degeneration/Necrosis | - | 1 (0.18%), N=562 | - | - | [0-25.00%] | - |
| Hemorrhage | - | 1 (0.18%), N=562 | - | - | [0-25.00%] | - |
| Infiltrate, (Mononuclear Cell) | - | 7 (1.25%), N=562 | 1 (1.02%), N=98 | - | [0-50.00%] | [0-11.11%] |
| Inflammation | - | 3 (0.53%), N=562 | - | - | [0-33.33%] | - |
| Parasite | - | 4 (0.71%), N=562 | - | - | [0-33.33%] | - |
| Liver | Congestion | - | 1 (0.15%), N=682 | - | - | [0-16.67%] | - |
| Degeneration/Necrosis | 4 (1.58%), N=253 | 5 (0.73%), N=682 | 1 (0.85%), N=118 | [0-16.67%] | [0-50.00%] | [0-20.00%] |
| Fibrosis | 1 (0.4%), N=253 | 7 (1.03%), N=682 | 4 (3.39%), N=118 | [0-100.00%] | [0-100.00%] | [0-40.00%] |
| Hypertrophy | - | 3 (0.44%), N=682 | 2 (1.69%), N=118 | - | [0-50.00%] | [0-40.00%] |
| Infiltrate (Mixed Leukocyte) | - | 1 (0.15%), N=682 | - | - | [0-16.67%] | - |
| Infiltrate, (Mononuclear Cell) | 71 (28.06%), N=253 | 229c* (33.58%), N=682 | 45c* (38.14%), N=118 | [0-100.00%] | [0-100.00%] | [0-100.00%] |
| Inflammation | 2 (0.79%), N=253 | 10 (1.47%), N=682 | 2 (1.69%), N=118 | [0-20.00%] | [0-33.33%] | [0-20.00%] |
| Pigment | 4 (1.58%), N=253 | 10 (1.47%), N=682 | - | [0-50.00%] | [0-100.00%] | - |
| Thrombus | - | 1 (0.15%), N=682 | - | - | [0-20.00%] | - |
| Vacuolation, (Hepatocellular) | 3 (1.19%), N=253 | 8 (1.17%), N=682 | - | [0-16.67%] | [0-40.00%] | - |
| Pancreas | Angiectasis | - | 1 (0.16%), N=620 | - | - | [0-16.67%] | - |
| Anomaly (Developmental) | 1 (0.44%), N=227 | 3 (0.48%), N=620 | - | [0-20.00%] | [0-33.33%] | - |
| Atrophy | - | 3 (0.48%), N=620 | - | - | [0-28.57%] | - |
| Degeneration/Necrosis | - | 3 (0.48%), N=620 | - | - | [0-25.00%] | - |
| Fibroplasia | - | 1 (0.16%), N=620 | - | - | [0-16.67%] | - |
| Hemorrhage | 1 (0.44%), N=227 | 2 (0.32%), N=620 | - | [0-16.67%] | [0-22.22%] | - |
| Infiltrate, (Mononuclear Cell) | 2 (0.88%), N=227 | 4 (0.65%), N=620 | 1 (1.02%), N=98 | [0-16.67%] | [0-25.00%] | [0-20.00%] |
| Inflammation | - | 1 (0.16%), N=620 | - | - | [0-20.00%] | - |
| Secretory Depletion | - | 4 (0.65%), N=620 | - | - | [0-25.00%] | - |
| Salivary Gland, Mandibular | Granuloma | 1 (0.45%), N=222 | - | - | [0-16.67%] | - | - |
| Infiltrate, (Mononuclear Cell) | 34 (15.32%), N=222 | 123 (20.57%), N=598 | 17 (17.35%), N=98 | [0-100.00%] | [0-100.00%] | [0-80.00%] |
| Inflammation | 1 (0.45%), N=222 | 1 (0.17%), N=598 | - | [0-20.00%] | [0-20.00%] | - |
| Metaplasia | - | 1 (0.17%), N=598 | - | - | [0-25.00%] | - |
| Mineralization | - | 5 (0.84%), N=598 | - | - | [0-25.00%] | - |
| Secretory Depletion | 1 (0.45%), N=222 | 3 (0.5%), N=598 | - | [0-12.50%] | [0-33.33%] | - |
| Salivary Gland, Parotid | Atrophy | - | 1 (0.26%), N=389 | 1 (1.02%), N=98 | - | [0-20.00%] | [0-20.00%] |
| Fibrosis | - | 1 (0.26%), N=389 | - | - | [0-25.00%] | - |
| Granuloma | 1 (1.85%), N=54 | - | - | [0-16.67%] | - | - |
| Infiltrate, (Mononuclear Cell) | 17a**, b** (31.48%), N=54 | 139a**, c** (35.73%), N=389 | 28b**, c** (28.57%), N=98 | [0-100.00%] | [0-100.00%] | [0-100.00%] |
| Mineralization | - | 5 (1.29%), N=389 | - | - | [0-20.00%] | - |
| Secretory Depletion | 1 (1.85%), N=54 | 1 (0.26%), N=389 | - | [0-16.67%] | [0-20.00%] | - |
| Vacuolation | - | 1 (0.26%), N=389 | - | - | [0-16.67%] | - |
| Salivary Gland, Sublingual | Infiltrate, (Mononuclear Cell) | 3a**, b** (17.65%), N=17 | 68a**, c** (31.92%), N=213 | 18b**, c** (20.45%), N=88 | [0-37.50%] | [0-100.00%] | [0-100.00%] |
| Small Intestine, Duodenum | Anomaly (Developmental) | - | 1 (0.16%), N=611 | - | - | [0-14.29%] | - |
| Infiltrate, (Mononuclear Cell) | 4 (1.83%), N=218 | 17 (2.78%), N=611 | - | [0-40.00%] | [0-100.00%] | - |
| Inflammation | - | 1 (0.16%), N=611 | - | - | [0-20.00%] | - |
| Macrophages | 2 (0.92%), N=218 | 3 (0.49%), N=611 | - | [0-50.00%] | [0-33.33%] | - |
| Mitotic Figures, Increased | - | 1 (0.16%), N=611 | - | - | [0-20.00%] | - |
| Pigment | - | 3 (0.49%), N=611 | - | - | [0-33.33%] | - |
| Small Intestine, Ileum | Hemorrhage | - | 1 (0.16%), N=609 | 1 (1.02%), N=98 | - | [0-20.00%] | [0-20.00%] |
| Hypertrophy/Hyperplasia | 1 (0.46%), N=218 | 1 (0.16%), N=609 | - | [0-20.00%] | [0-16.67%] | - |
| Lymphangiectasis | - | 6 (0.99%), N=609 | - | - | [0-60.00%] | - |
| Macrophages | 4 (1.83%), N=218 | - | - | [0-100.00%] | - | - |
| Mucification, Increased | - | 1 (0.16%), N=609 | - | - | [0-16.67%] | - |
| Parasite | - | 1 (0.16%), N=609 | - | - | [0-16.67%] | - |
| Small Intestine, Jejunum | Adhesion/Inflammation/Fibrosis | - | 1 (0.17%), N=606 | - | - | [0-25.00%] | - |
| Hypertrophy/Hyperplasia | 1 (0.46%), N=218 | 1 (0.17%), N=606 | - | [0-100.00%] | [0-16.67%] | - |
| Lymphangiectasis | - | 2 (0.33%), N=606 | - | - | [0-20.00%] | - |
| Macrophages | 2 (0.92%), N=218 | - | - | [0-50.00%] | - | - |
| Stomach | Atrophy | 1 (0.44%), N=229 | - | - | [0-20.00%] | - | - |
| Degeneration/Necrosis | - | 1 (0.15%), N=663 | 1 (0.92%), N=109 | - | [0-33.33%] | [0-25.00%] |
| Dilatation/Inflammation | - | 2 (0.3%), N=663 | - | - | [0-33.33%] | - |
| Erosion/Ulcer | - | 1 (0.15%), N=663 | - | - | [0-16.67%] | - |
| Hemorrhage | 1 (0.44%), N=229 | 9 (1.36%), N=663 | 1 (0.92%), N=109 | [0-16.67%] | [0-25.00%] | [0-20.00%] |
| Histiocytosis | - | 2 (0.3%), N=663 | - | - | [0-33.33%] | - |
| Infiltrate, (Mononuclear Cell) | 27 (11.79%), N=229 | 95 (14.33%), N=663 | 8 (7.34%), N=109 | [0-83.33%] | [0-100.00%] | [0-88.89%] |
| Inflammation | 3 (1.31%), N=229 | 10 (1.51%), N=663 | 1 (0.92%), N=109 | [0-20.00%] | [0-40.00%] | [0-20.00%] |
| Mineralization | - | 1 (0.15%), N=663 | - | - | [0-33.33%] | - |
| Parasite | 1 (0.44%), N=229 | 1 (0.15%), N=663 | - | [0-16.67%] | [0-16.67%] | - |
| Regeneration | 1 (0.44%), N=229 | 1 (0.15%), N=663 | - | [0-20.00%] | [0-16.67%] | - |
| Tongue | Degeneration/Necrosis | - | 1 (0.18%), N=555 | - | - | [0-20.00%] | - |
| Erosion/Ulcer | - | 2 (0.36%), N=555 | - | - | [0-20.00%] | - |
| Granuloma | - | 1 (0.18%), N=555 | - | - | [0-33.33%] | - |
| Infiltrate, (Mononuclear Cell) | 2 (1.14%), N=176 | 17 (3.06%), N=555 | - | [0-16.67%] | [0-66.67%] | - |
| Inflammation (Eosinophils) | - | 1 (0.18%), N=555 | - | - | [0-16.67%] | - |
| Inflammation | 1 (0.57%), N=176 | 5 (0.9%), N=555 | - | [0-16.67%] | [0-33.33%] | - |
| Regeneration | - | 1 (0.18%), N=555 | - | - | [0-20.00%] | - |
